# Supplementary material for: Nanopore-based consensus sequencing enables accurate multimodal tumor cell-free DNA profiling
Source: Genome Res. 2025 Apr;35(4):886–99. doi: 10.1101/gr.279144.124 (PMC12047234; doi:10.1101/gr.279144.124)
Supplement: Supplement 14 [file Supplemental_Table_S1.xlsx]

## Sheet: Sheet1
Sample_ID	Tumor_Type	Bioliquid type	NanoRCS Run name	Protocol	Backbone name	Input DNA (ng)	System	Raw reads (n)	Raw bases (bp)	Unique consensus reads (n)	Unique consensus bases (bp)	(Interpolated) median concatemer subread count	Fraction of reads contributed to unique consensus reads (%)	Fraction of bases contributed to unique bases
HC01	No Tumor	plasma	"CYC000217"	C	BBCS	5	PromethION	26816916	79381820578	8905143	2241979451	4.23	0.332072	0.028243
HC02	No Tumor	plasma	"CYC000218"	C	BBCS	5	PromethION	21525318	62050425637	7946018	1877449265	4.23	0.369148	0.0302568
HC03	No Tumor	plasma	"CYC000176-177"	C	BBCS	5	PromethION	14924370	105076559467	6453280	1746662447	4.85	0.432399	0.0166228
OVCA01	Ovarian Carcinoma	ascites	"DER5172"	A	BBCR	10	PromethION	5982428	34481149605	4471867	1025643511	9.08	0.7475	0.029745
OVCA02	Ovarian Carcinoma	ascites	"CYC000084"	C	BB41C	5	MinION	1693732	7743487526	869287	215576740	6.72	0.513238	0.0278397
OVCA03	Ovarian Carcinoma	ascites	"MAR6939"	A	BBCR	10	MinION	3255716	11999050467	912895	322597671	6.3	0.280398	0.0268853
OVCA04	Ovarian Carcinoma	ascites	"CYC000108"	C	BB41C	5	MinION	1185351	3013307634	114105	26864559	6.99	0.0962626	0.00891531
OVCA05	Ovarian Carcinoma	ascites	"CYC000235"	C	BBCS	10	MinION	526943	1819362370	268204	85217924	16.82	0.508981	0.0468394
OVCA06	Ovarian Carcinoma	ascites	"CYC000236"	C	BBCS	5	MinION	559427	1926880002	267578	59691871	6.64	0.478307	0.0309785
OVCA07	Ovarian Carcinoma	ascites	"MAR7070"	B	BBCR	10	MinION	4860826	7809150461	278076	84670311	6.59	0.0572076	0.0108424
GCT01B12	Adult-type granulosa cell tumor	plasma	"CYC000056"	C	BB41C	5	MinION	1988016	4937391852	1231394	217223117	3.78	0.619408	0.0439955
GCT02B6	Adult-type granulosa cell tumor	plasma	"CYC000057"	C	BB41C	5	MinION	1344440	3655183797	762973	166245280	4.44	0.567502	0.0454821
EAC01	Esophageal adenocarcinoma	plasma	"CYC000080"	C	BB41C	5	MinION	2064386	8691182857	1068100	182582310	7.07	0.517394	0.0210078
EAC02	Esophageal adenocarcinoma	plasma	"CYC000106"	C	BBCS	5	MinION	1570181	3684711026	142951	27604020	7.62	0.0910411	0.0074915
EAC03	Esophageal adenocarcinoma	plasma	"CYC000081"	C	BB41C	5	MinION	1947071	9240472697	1291239	207834793	7.31	0.66317	0.0224918
EAC04	Esophageal adenocarcinoma	plasma	"CYC000082"	C	BB41C	5	MinION	1531884	7879868379	1035921	169203751	7.43	0.67624	0.0214729
EAC05	Esophageal adenocarcinoma	plasma	"CYC000083"	C	BB41C	5	MinION	1403031	7007359201	1002096	162673598	7.24	0.714237	0.0232147
GCT02B4	Adult-type granulosa cell tumor	plasma	"CYC000184"	C	BBCS	5	PromethION	12294997	45706000000	3578174	859407992	5.55	0.291027	0.018803
GCT02B9	Adult-type granulosa cell tumor	plasma	"CYC000185"	C	BBCS	5	PromethION	4722351	17812000000	896261	216764789	5.52	0.189791	0.0121696
GCT02B10	Adult-type granulosa cell tumor	plasma	"CYC000194"	C	BBCS	5	PromethION	21344807	76450863281	3308373	887667128	5.24	0.154997	0.0116109
GCT02B11	Adult-type granulosa cell tumor	plasma	"CYC000195"	C	BBCS	5	PromethION	18883193	70248807191	947601	223858375	5.6	0.0501822	0.00318665
10PEROVCA01HC02	Synthetic	admixture	"CYC000151"	C	BBCS	5	PromethION	5966737	27532091104	2154069	391905057	5.19	0.361013	0.0142345
2PEROVCA01HC02	Synthetic	admixture	"CYC000152"	C	BBCS	5	PromethION	18510972	65625305774	7640308	1858257968	5.58	0.412745	0.0283162
1PEROVCA01HC02	Synthetic	admixture	"CYC000219"	C	BBCS	5	PromethION	18316352	67862000000	6845143	1783369995	4.86	0.373718	0.0262794
05PEROVCA01HC02	Synthetic	admixture	"CYC000220"	C	BBCS	5	PromethION	24830194	95749000000	6714828	1655830943	4.85	0.27043	0.0172935
HC04			"CYC000394"				PromethION	21044463	119710217242	5160250	1383840615	7.22	0.245207	0.0115599
HC06			"CYC000395"				PromethION	8965204	78329235588	4571333	1553195339	8.79	0.509897	0.0198291
HC07			"CYC000396"				PromethION	14464513	100451215736	6224041	2226651863	6.621	0.430297	0.0221665
HC08			"CYC000397"				PromethION	14691826	30987544194	1706616	509725627	3.629	0.116161	0.0164494

## Sheet: README
Supplemental Table S1. Sample overview, sequencing statistics and consensus sequencing statistics.
Information on sample name, run name, sequencing platform, throughput of raw and consensus sequencing runs.
