# Supplementary material for: Nanopore-based consensus sequencing enables accurate multimodal tumor cell-free DNA profiling
Source: Genome Res. 2025 Apr;35(4):886–99. doi: 10.1101/gr.279144.124 (PMC12047234; doi:10.1101/gr.279144.124)
Supplement: Supplement 15 [file Supplemental_Table_S2.xlsx]

## Sheet: Sheet1
	Patient Tumor information								Whole-Genome Sequencing Information								Cell-free DNA Sequencing Information
Sample_ID	Gender	Tumor_Type	Year of primary diagnosis	Age at diagnosis	Other cancer	Disease subtype	Tumor Stage at primary diagnosis	Tumor driver mutational status in tumor tissue biopsy	Tumor tissue available for sequencing	WGS tumor tissue sequenced	Tumor biopsy site (for WGS)	Tumor biopsy type (for WGS)	Paired normal bulk sequencing	Disease status at the time of WGS	Type of tissue collection	Treatment before tissue collection	Days between cfDNA collection and WGS tissue collection (negative means cfDNA was before tissue collection)	Bioliquid type	Tumor fraction ddPCR	Disease status (CR, PR, SD, PD) - at the time of cfDNA sampling	Treatment and surgery between tissue biopsy WGS and cfDNA collection	cfDNA measurement is N Days before patient is deceased or patient is alive (Days)
OVCA01	F	Ovarian Carcinoma	2016	69	No	HGS	IV	BRCA wildtype	No	Yes, (Kopper et al. 2019; de Witte et al. 2020)	Ascites cells	Fresh frozen	PBMC	Active disease	Separate cell collection	Chemotherapy (cealyx)	0	ascites	NA	Active disease	No time in between	113
OVCA02	F	Ovarian Carcinoma	2017	78	No	HGS (with CC component)	IIIC	not tested	No									ascites	NA	Active disease	No	167
OVCA03	F	Ovarian Carcinoma	2017	66	No	HGS	IIB	not tested	No									ascites	NA	Active disease	No	Alive
OVCA04	F	Ovarian Carcinoma	2017	65	No	LGS	IIIC	BRCA wildtype, CHEK2 mutant	No									ascites	NA	Active disease	No	Alive
OVCA05	F	Ovarian Carcinoma	2017	73	No	HGS	IIIC	not tested	No									ascites	NA	Active disease	No	539
OVCA06	F	Ovarian Carcinoma	2018	74	No	carcinosarcoma	IIIC	not tested (DNA available)	No									ascites	NA	Active disease	No	63
OVCA07	F	Ovarian Carcinoma	2018	79	No	HGS	IIIC	not tested	No									ascites	NA	Active disease	No	Alive
GCT01B12	F	Adult-type granulosa cell tumor	2015	54	No	NA	FIGO IC	not tested	No	Yes, (Roze et al, 2020, Cancers)	Spleen	Fresh frozen	PBMC	PD	during surgery	3x surgery, letrozol, tamoxifen, zoladex, cyclofosfamide/bevacizumab	539	plasma	FOXL2 c.402C>G 18.6094%	PD	itraconazol, radiotherapy, paclitaxel, pembrolizumab	74
GCT02B4	F	Adult-type granulosa cell tumor	2001	58	No	NA	FIGO IA	neutral (See GCPA019 in Roze et al, 2020, Cancers)	No	Yes, (Roze et al, 2020, Cancers)	lateral of psoas muscle	Fresh frozen	PBMC	PD	separate biopsy	5x surgery, cisplatin/etoposide, carboplatin/paclitaxel, carboplatin/docetaxel	266	plasma	FOXL2 c.402C>G 35.722%	PD	carboplatin/docetaxel	563
GCT02B6	F	Adult-type granulosa cell tumor	Same as GCT02B4														378	plasma	FOXL2 c.402C>G 40.0673%	PD	carboplatin/docetaxel, surgery	451
GCT02B9	F	Adult-type granulosa cell tumor	Same as GCT02B4														566	plasma	FOXL2 c.402C>G 1.7778%	PD	carboplatin/docetaxel, surgery, carboplatin/docetaxel	263
GCT02B10	F	Adult-type granulosa cell tumor	Same as GCT02B4														594	plasma	FOXL2 c.402C>G 1.2785%	SD	carboplatin/docetaxel, surgery, carboplatin/docetaxel	235
GCT02B11	F	Adult-type granulosa cell tumor	Same as GCT02B4														615	plasma	FOXL2 c.402C>G 0.1267%	SD	carboplatin/docetaxel, surgery, carboplatin/docetaxel	214
EAC01	M	Esophageal adenocarcinoma	2016	77	Hepatocellulair caricnoma (2014)	adenocarcinoma, moderate differentiation	cT2N2M1	HER2 negative (IHC)	Yes	Yes, in this study	Liver metastasis	FFPE	PBMC	NA (tissue biopsy at diagnosis)	Seperate biopsy	None	23	plasma	TP53 c.818G>A, (12%)	NA (before chemotherapy)	No treatment	Alive
EAC02	M	Esophageal adenocarcinoma	2016	65	Colorectal carcinoma pT2N0M0 (2015), poor differentiated small cell carcinoma distal esophagus with possibly liver and lymph node metasteses on PET-ct (2016)	adenocarcinoma, moderate to poor differentiation	cT2/3N1Mx	HER2 negative (IHC)	Yes	Yes, in this study	Liver metastasis	FFPE	PBMC	PD	Seperate biopsy	Four cycles of etoposide and cisplatin until december 2016	13	plasma	TP53 c.733G>A (37%)	PD	No treatment	Alive
EAC03	M	Esophageal adenocarcinoma	2015	65	No	adenocarcinoma, poor differentiation	cTxNxM1	HER2 negative (IHC)	Yes	No	Omentus minus	FFPE	PBMC	PD	Seperate biopsy	Palliative chemotherapy, CAPOX+ Nab-paclitaxel	-212	plasma	TP53 c.892G>T (15%), KRAS c.35G>A (4%)	NA (before chemotherapy)	Between cfDNA and tissue collection palliative chemotherapy	266
EAC04	M	Esophageal adenocarcinoma	2015	44	No	adenocarcinoma, moderate to poor differentiation	cT3N3M1	HER2 negative (IHC)	Yes	No	Oesophagus	FFPE	PBMC	PD	Seperate biopsy	Palliative chemotherapy, CAPOX+ Nab-paclitaxel, thereafter capecitabine monotherapy	-217	plasma	TP53 c.742C>T (2%)	NA (before chemotherapy)	Between cfDNA and tissue collection palliative chemotherapy	273
EAC05	M	Esophageal adenocarcinoma	2014	63	No	adenocarcinoma	cT2N2M0	HER2 negative (IHC)	Yes	No	Liver metastasis	FFPE	PBMC	PD	Seperate biopsy	Neoadjuvant chemoradiotherapy CROSS, no surgery because of disease progression	19	plasma	TP53 c.388C>G (2%), c.916C>T (4%), CDKN2A c.172C>T (6%)	SD (liver metastases)	No treatment	196

## Sheet: README
Supplemental Table S2. Patient tumor biopsy and liquid biopsy overview.
Information on cancer patient samples. including sample ID, patient tumor information, whole-genome sequencing information of tumor biopsy or tumor bulk, and cell-free DNA sequencing information.
