# Supplementary material for: Nanopore-based consensus sequencing enables accurate multimodal tumor cell-free DNA profiling
Source: Genome Res. 2025 Apr;35(4):886–99. doi: 10.1101/gr.279144.124 (PMC12047234; doi:10.1101/gr.279144.124)
Supplement: Supplement 16 [file Supplemental_Table_S3.xlsx]

## Sheet: Sheet1
		Genome-wide NanoRCS					NovaSeq					Tumor allele fraction in ddPCR
Sample Name	Sample Type	Fragment length-derived TF	CNA-derived TF	SNV-derived TF	SNV-derived TF 95% CI low	SNV-derived TF 95% CI high	Fragment length-derived TF	CNA-derived TF	SNV-derived TF	SNV-derived TF 95% CI low	SNV-derived TF 95% CI high	Locus (highest TF locus)	MUT fraction
HC01	Healthy	0	0.015	0.0034	0.0016	0.00702	0.018	0.01	0.000431	0	0.0002888	NA	NA
HC02	Healthy	0	0.003	0.0055	0.003	0.01042	0.158	0.008	3e-06	0	0.000105	NA	NA
HC03	Healthy	0	0.013	0.00362	0.0016	0.00888	0	0.009	0.000819	0	0.000288	NA	NA
HC04	Healthy	0.133	0.032	0.00454	0.00188	0.012	NA	NA	NA	NA	NA	NA	NA
HC06	Healthy	0.152	0.026	0.00492	0.00224	0.01144	NA	NA	NA	NA	NA	NA	NA
HC07	Healthy	0.053	0.027	0.00246	0.001	0.0071	NA	NA	NA	NA	NA	NA	NA
HC08	Healthy	0.021	0.016	0.0012	0.0002	0.01014	NA	NA	NA	NA	NA	NA	NA
OVCA01	OVCA	1	0.713	0.65	0.61	0.69	0.511	0.684	0.68	0.61	0.75	NA	NA
OVCA02	OVCA	0.196804	0.243	NA	NA	NA	0.662	0.243	NA	NA	NA	NA	NA
OVCA03	OVCA	0.729793	0.297	NA	NA	NA	0.715	0.3518	NA	NA	NA	NA	NA
OVCA04	OVCA	0.303269	0.071	NA	NA	NA	0.657	0.1886	NA	NA	NA	NA	NA
OVCA05	OVCA	0.230353	0.734	NA	NA	NA	0.705	0.6853	NA	NA	NA	NA	NA
OVCA06	OVCA	0.351479	0.429	NA	NA	NA	0.562	0.414	NA	NA	NA	NA	NA
OVCA07	OVCA	0.539329	0.686	NA	NA	NA	0.581	0.6764	NA	NA	NA	NA	NA
GCT01	GCT	0.607071	0.413	0.69	0.6	0.77	0.756	0.4216	0.94	0.92	0.94	0.186	FOXL2 c.402C>G
GCT02B4 (day 237)	GCT	0.368	0.415	0.27	0.23	0.3	NA	NA	NA	NA	NA	0.4855	FOXL2 c.402C>G
GCT02B6 (day 309)	GCT	0.46398	0.495	0.306	0.28	0.47	0.717	0.4955	0.63	0.61	0.64	0.4	FOXL2 c.402C>G
GCT02B9 (day 525)	GCT	0.325	0.06	0.044	0.02	0.088	NA	NA	NA	NA	NA	0.012	FOXL2 c.402C>G
GCT02B10 (day 546)	GCT	0.203	0.287	0.003	0	0.012	NA	NA	NA	NA	NA	0.0012	FOXL2 c.402C>G
GCT02B11 (day 567)	GCT	0.319	0.381	0	0	0.02	NA	NA	NA	NA	NA	0.00094	FOXL2 c.402C>G
EAC01	EAC	0.418653	0.1	0.16	0.12	0.24	0.344	0.102	0.26	0.23	0.27	0.12	TP53 c.818G>A
EAC02	EAC	0.548834	0.307	0.43	0.24	0.76	0.684	0.2989	0.67	0.63	0.69	0.37	TP53 c.733G>A
EAC03	EAC	0.558483	0.109	NA	NA	NA	0.556	0.102	NA	NA	NA	0.15	TP53 c.892G>T
EAC04	EAC	0.556644	0.026	NA	NA	NA	0.47	0.034	NA	NA	NA	0.02	TP53 c.742C>T
EAC05	EAC	0.60336	0.078	NA	NA	NA	0.452	0.07	NA	NA	NA	0.06	CDKN2A c.172C>T

## Sheet: README
Supplemental Table S3. Tumor fractions of all samples.
Tumor fraction derived from three modalities with genome-wide NanoRCS sequencing and NovaSeq, as well as point mutation frequency measured with ddPCR when available.
