# Supplementary material for: Nanopore-based consensus sequencing enables accurate multimodal tumor cell-free DNA profiling
Source: Genome Res. 2025 Apr;35(4):886–99. doi: 10.1101/gr.279144.124 (PMC12047234; doi:10.1101/gr.279144.124)
Supplement: Supplement 17 [file Supplemental_Table_S4.xlsx]

## Sheet: Sheet1
	Read length (bp)
Technique	Sample	31	32	33	34	35	36	37	38	39	40	41	42	43	44	45	46	47	48	49	50	51	52	53	54	55	56	57	58	59	60	61	62	63	64	65	66	67	68	69	70	71	72	73	74	75	76	77	78
NanoRCS	HC01	0	0	0	0	0	0	0	0	0	0	0	0	0	0	0	12	18	7	13	22	37	37	42	48	60	100	104	121	156	179	209	230	277	319	415	441	504	525	570	661	745	753	832	822	1009	1111	1167	1311
NanoRCS	HC02	0	0	0	0	0	0	0	0	0	0	0	0	0	0	10	11	17	19	24	32	39	46	70	77	101	118	149	187	225	247	286	316	365	433	501	603	725	762	833	908	994	1069	1067	1274	1285	1434	1560	1687
NanoRCS	HC03	0	0	0	0	0	0	0	0	0	0	0	0	0	0	0	0	0	9	10	16	23	34	34	46	62	68	85	93	120	137	165	206	250	238	273	318	358	444	434	487	512	532	600	592	696	742	803	797
NanoRCS	OVCA01	0	0	0	0	0	0	0	0	0	0	0	0	0	0	0	0	0	0	0	0	0	0	0	0	0	0	35	53	68	89	117	134	125	124	114	128	152	234	315	371	406	457	394	301	245	240	242	283
NanoRCS	OVCA02	0	0	0	0	0	0	0	0	0	0	0	0	0	0	0	0	0	0	0	0	0	0	0	0	0	0	0	7	6	7	8	10	16	15	14	20	20	16	30	25	23	23	35	32	36	37	33	42
NanoRCS	OVCA03	0	0	0	0	0	0	0	0	0	0	0	0	0	0	0	0	0	0	0	0	0	0	0	0	0	0	0	0	0	0	0	0	10	15	14	22	33	27	29	48	54	35	44	32	45	72	61	86
NanoRCS	OVCA04	0	0	0	0	0	0	0	0	0	0	0	0	0	0	0	0	0	0	0	0	0	0	0	0	0	22	20	28	48	46	41	50	62	61	75	68	70	95	97	112	102	127	119	141	173	157	147	149
NanoRCS	OVCA05	0	0	0	0	0	0	0	0	0	0	0	0	0	0	0	0	0	0	0	0	0	0	0	0	0	0	0	0	0	0	10	14	22	15	24	24	30	29	29	38	37	49	47	45	52	65	64	65
NanoRCS	OVCA06	0	0	0	0	0	0	0	0	0	0	0	0	0	0	0	0	0	0	15	10	8	18	15	17	20	24	36	50	45	59	75	75	95	99	119	149	150	162	182	217	246	235	258	238	283	287	300	318
NanoRCS	OVCA07	0	0	0	0	0	0	0	0	0	0	0	0	0	0	0	0	0	0	0	0	0	0	0	0	0	0	0	0	0	0	19	15	7	15	15	28	29	44	36	46	50	69	47	63	72	120	112	140
NanoRCS	GCT01	0	0	0	0	0	0	0	0	0	0	0	0	0	0	0	0	0	0	0	18	36	44	62	90	98	155	163	186	287	292	338	430	525	576	655	764	853	937	1029	1055	1294	1309	1423	1516	1605	1699	1830	1971
NanoRCS	GCT02	0	0	0	0	0	0	0	0	0	0	0	0	0	0	0	0	0	0	0	0	0	0	0	0	41	52	79	79	109	122	125	171	152	230	254	266	297	364	374	441	416	466	480	514	545	574	641	645
NanoRCS	EAC01	0	0	0	0	0	0	0	0	0	0	0	0	0	0	0	0	0	0	0	28	33	39	61	88	81	140	200	218	239	301	357	473	560	630	717	856	969	1066	1191	1367	1488	1676	1739	1884	2079	2181	2317	2476
NanoRCS	EAC02	0	0	0	0	0	0	0	0	0	0	0	0	0	0	0	0	0	0	0	0	0	0	0	12	11	25	28	31	29	48	54	65	73	72	76	86	105	93	128	128	116	151	144	158	178	176	186	181
NanoRCS	EAC03	0	0	0	0	0	0	0	0	0	0	0	0	0	0	0	0	0	0	23	29	39	38	76	101	126	152	185	244	335	370	449	600	653	776	867	1020	1192	1270	1439	1650	1761	1834	2163	2224	2458	2624	2803	2906
NanoRCS	EAC04	0	0	0	0	0	0	0	0	0	0	0	0	0	0	0	0	0	0	18	18	25	47	78	53	96	114	137	172	204	250	329	406	432	538	642	735	906	942	1038	1161	1278	1391	1515	1602	1775	1895	1992	2148
NanoRCS	EAC05	0	0	0	0	0	0	0	0	0	0	0	0	0	0	0	0	0	0	0	20	29	40	54	70	86	119	162	200	248	313	398	414	505	607	696	795	899	1009	1179	1305	1362	1559	1625	1819	1951	1959	2151	2298
NanoRCS	10PEROVCA01HC02	0	0	0	0	0	0	0	0	0	0	0	0	0	0	0	0	12	29	33	40	45	75	100	116	170	198	223	306	372	417	563	663	767	878	1022	1204	1413	1577	1705	1899	2016	2291	2464	2650	2889	3172	3280	3412
NanoRCS	2PEROVCA01HC02	0	0	0	0	0	0	0	0	0	0	0	0	0	0	0	0	7	12	14	27	33	27	41	49	73	83	115	142	140	153	195	234	304	351	380	425	489	540	603	657	687	751	819	893	1009	1061	1118	1120
NanoRCS	1PEROVCA01HC02	0	0	0	0	0	0	0	0	0	0	0	12	11	13	14	16	21	28	38	52	58	57	69	101	99	159	188	236	235	269	293	371	451	469	588	666	734	764	910	952	1044	1056	1135	1264	1323	1473	1633	1731
NanoRCS	05PEROVCA01HC02	0	0	0	0	0	0	0	0	0	0	0	0	0	8	14	17	20	17	26	30	60	51	68	91	94	140	164	163	200	249	291	339	342	407	507	603	625	707	832	867	1006	1051	1139	1250	1380	1443	1565	1694
NanoRCS	GCT02-B4	0	0	0	0	0	0	0	0	0	0	0	0	0	0	15	14	17	25	41	38	72	82	85	131	163	216	257	333	390	404	558	661	717	856	1066	1181	1336	1432	1578	1774	1944	2124	2327	2537	2715	2807	3122	3206
NanoRCS	GCT02-B6	0	0	0	0	0	0	0	0	0	0	0	0	0	0	0	0	0	0	0	0	0	0	0	0	41	52	79	79	109	122	125	171	152	230	254	266	297	364	374	441	416	466	480	514	545	574	641	645
NanoRCS	GCT02-B9	0	0	0	0	0	0	0	0	0	0	0	0	0	0	4	3	3	7	12	9	9	14	34	27	35	65	62	100	113	111	161	151	214	232	294	307	336	424	426	512	533	565	625	660	711	778	817	822
NanoRCS	GCT02-B10	0	0	0	0	0	0	0	0	0	0	0	0	0	6	11	9	16	15	19	18	30	50	56	68	78	105	113	159	168	191	253	260	334	432	466	506	572	688	782	837	917	1062	1128	1261	1360	1387	1609	1752
NanoRCS	GCT02-B11	0	0	0	0	0	0	0	0	0	0	0	0	3	7	7	7	4	3	11	10	14	19	27	34	44	48	63	65	86	99	112	113	148	168	185	236	298	335	341	383	435	457	482	528	605	672	700	748
NovaSeq	HC01	6	3	11	16	21	19	36	32	36	40	54	52	46	68	62	66	96	109	130	106	127	148	127	142	181	183	203	239	255	337	328	332	314	314	366	418	476	551	601	675	690	682	650	699	707	751	879	1039
NovaSeq	HC02	20	30	39	42	43	64	58	83	92	92	95	101	140	132	140	164	173	226	256	271	296	284	277	311	297	376	374	461	539	560	548	505	560	611	632	684	743	892	1099	1206	1168	1160	1041	1144	1356	1383	1551	1834
NovaSeq	HC03	108	144	188	203	240	267	293	312	393	386	490	482	516	548	602	659	704	817	973	985	1178	1082	1178	1517	1459	1642	1893	2162	2475	2674	2811	2879	2986	3175	3535	3750	4030	4507	5265	5817	5813	5691	6039	6131	6725	7337	8002	9621
NovaSeq	OVCA01	36	36	26	48	43	47	59	69	68	78	78	87	67	68	94	105	110	135	186	209	151	182	158	182	196	203	223	257	335	373	359	307	334	315	372	384	488	550	806	1024	846	749	718	737	657	821	888	1073
NovaSeq	OVCA02	196	204	217	218	262	323	377	467	535	591	635	667	740	859	1009	1265	1494	1726	2221	2364	2483	2481	2729	3146	3440	4152	4793	5702	7056	8201	8210	7547	7858	8257	8848	9675	10752	12395	14580	15532	14666	13748	13860	14120	14985	15152	16384	18731
NovaSeq	OVCA03	163	177	198	279	275	321	355	421	566	562	531	545	589	671	759	888	1039	1202	1577	1880	1742	1714	1709	1733	1986	2226	2492	2877	3551	4054	4183	3814	3804	4155	4279	4707	5452	6514	8182	9936	9267	8175	8244	8267	8820	9278	10002	11335
NovaSeq	OVCA04	79	86	101	100	109	158	163	196	229	230	259	249	303	321	335	442	493	641	757	912	837	824	836	916	1065	1189	1343	1725	2084	2413	2392	2200	2277	2432	2568	3018	3480	4074	4997	6117	5443	4961	4964	4864	5460	6032	6522	7799
NovaSeq	OVCA05	773	856	957	1025	1129	1418	1673	2197	3603	3158	2693	2580	2260	2581	2940	3392	4382	5891	9594	12798	8923	7139	7071	5628	6077	7433	8692	11689	16212	20400	19037	14852	14342	14744	14428	17125	20091	26360	38100	52040	44970	35488	31222	28856	31032	35117	38427	45912
NovaSeq	OVCA06	161	197	223	210	250	295	407	562	805	720	618	663	673	794	951	1173	1476	2197	3164	3890	3156	2830	3177	3575	4054	4940	6158	8281	11710	13879	12909	10820	11320	12945	14086	16121	19268	24544	32885	39506	34359	29560	28855	28587	30383	31777	34243	39687
NovaSeq	OVCA07	292	318	349	419	512	602	637	722	915	920	963	988	1179	1330	1474	1725	1954	2567	3155	3699	3481	3473	3624	3897	4471	5199	5978	7227	9007	10343	10240	9148	9534	10180	10782	11945	13185	15970	19498	22162	20479	19097	18683	19089	20071	20708	21654	24124
NovaSeq	GCT01	87	163	203	243	327	377	466	576	616	693	834	882	997	1261	1340	1598	1988	2475	3231	3713	4002	3794	4145	4645	5010	5955	6945	8461	10406	11475	12023	12141	12141	13093	14447	14931	16687	19069	23274	26397	25395	24669	24558	24720	25950	28541	31438	37871
NovaSeq	GCT02	142	159	238	250	329	433	472	580	701	754	855	848	1023	1296	1422	1727	2106	2706	3500	4041	4194	4184	5065	5423	6211	7062	8275	9588	11756	13366	13819	13317	13943	15049	15791	16829	18439	20901	24764	28619	28281	27111	26682	27425	29165	31082	33188	37304
NovaSeq	EAC01	98	155	247	332	492	540	720	922	1278	1452	1672	1860	2157	2755	3218	3896	4704	6099	7715	8376	8393	8288	8469	9157	9630	11062	12639	15085	18443	20224	20057	18145	18009	18297	18693	19651	20968	24109	29190	32812	30773	27461	26730	26661	29284	31250	34270	40095
NovaSeq	EAC02	136	202	203	260	350	402	525	675	885	1084	1269	1362	1571	1939	2218	2724	3414	4856	6755	7853	7672	7284	7803	8207	9442	10877	12693	16199	21319	25462	25162	22528	22167	23396	23667	25046	27996	32765	42028	51066	48887	44948	43752	43581	45541	48173	51641	59430
NovaSeq	EAC03	1218	3838	6000	7534	8598	9776	10906	11898	13262	14483	15781	17079	18636	19985	21154	22631	24468	26699	29496	31851	33209	34447	36576	37601	42605	44692	46936	50996	55105	58749	61259	62055	63861	66746	68779	71393	73476	78066	85006	90516	91443	91154	92859	95596	98029	100676	105635	112841
NovaSeq	EAC04	852	2557	3798	4830	5398	5934	6522	7228	7844	8665	9466	10187	10892	11781	12480	13626	14566	15559	16801	18050	19005	19750	20742	21728	22829	24284	25906	27651	29948	31481	32700	33467	34548	34411	37812	39483	40562	43584	47401	50404	49965	50167	51240	52316	54517	56188	58863	63825
NovaSeq	EAC05	2285	5539	7763	9406	10819	12223	13956	15521	17907	18997	20080	21308	22738	24672	26526	29151	32293	37192	44271	48539	46434	45625	47022	48992	51200	55072	60457	68463	78646	85843	84384	78684	78037	79330	80631	83439	88310	98974	120652	135849	124996	114573	109946	109976	113700	118582	126077	142186
[truncated: 5,000 more columns]

## Sheet: README
Supplemental Table S4. cfDNA read length distribution.
cfDNA read length distribution for each sample with NanoRCS and NovaSeq sequencing between 31-10,000 bp. The number in each cell is the actual read count without normalization.
