# Supplementary material for: Nanopore-based consensus sequencing enables accurate multimodal tumor cell-free DNA profiling
Source: Genome Res. 2025 Apr;35(4):886–99. doi: 10.1101/gr.279144.124 (PMC12047234; doi:10.1101/gr.279144.124)
Supplement: Supplement 18 [file Supplemental_Table_S5.xlsx]

## Sheet: Sheet1
configfile_highTF.yaml
out_path: /path/to/dir
readCounterScript: /path/to/HMMcopy/bin/readCounter (we used conda installed hmmcopy (version 0.1.1))
chrs: 1,2,3,4,5,6,7,8,9,10,11,12,13,14,15,16,17,18,19,20,21,22
binSize: 1000000 # set window size to compute coverage
## ichorCNA params ##
ichorCNA_libdir: ../../../ichorCNA
# included in GitHub repo
ichorCNA_rscript: ../runIchorCNA.R
# use panel matching same bin size (optional)
ichorCNA_normalPanel: Customized_REF_PoN_hg19_1Mb_median.rds, Customized_CYC_PoN_hg19_1Mb_median.rds, HD_ULP_PoN_1Mb_median_normAutosome_mapScoreFiltered_median.rds
# must use gc wig file corresponding to same binSize (required)
ichorCNA_gcWig: ../../inst/extdata/gc_hg19_1000kb.wig
# must use map wig file corresponding to same binSize (required)
ichorCNA_mapWig: ../../inst/extdata/map_hg19_1000kb.wig
# use bed file if sample has targeted regions, eg. exome data (optional)
ichorCNA_exons: NULL
ichorCNA_centromere: ../../inst/extdata/GRCh37.p13_centromere_UCSC-gapTable.txt
ichorCNA_minMapScore: 0.75
ichorCNA_chrs: c(1:22)
ichorCNA_fracReadsInChrYForMale: 0.002
ichorCNA_genomeBuild: hg19
ichorCNA_genomeStyle: NCBI
# chrs used for training ichorCNA parameters, e.g. tumor fraction.
ichorCNA_chrTrain: c(1:22)
# non-tumor fraction parameter restart values; higher values should be included for cfDNA
ichorCNA_normal: c(0.0,0.1,0.2,0.3,0.4,0.5,0.6,0.7,0.8,0.9,0.95)
# ploidy parameter restart values
ichorCNA_ploidy: c(2,3,4)
ichorCNA_estimateNormal: TRUE
ichorCNA_estimatePloidy: TRUE
config_highTF.yaml
ichorCNA_estimateClonality: TRUE
# states to use for subclonal CN
ichorCNA_scStates: c(1,3)
# set maximum copy number to use
ichorCNA_maxCN: 8
# TRUE/FALSE to include homozygous deletion state
ichorCNA_includeHOMD: FALSE
# Exclude solutions if total length of subclonal CNAs > this fraction of the genome
ichorCNA_maxFracGenomeSubclone: 0.5
# Exclude solutions if total length of subclonal CNAs > this fraction of total CNA length
ichorCNA_maxFracCNASubclone: 0.7
# control segmentation - higher (e.g. 0.9999999) leads to higher specificity and fewer segments
# lower (e.g. 0.99) leads to higher sensitivity and more segments
ichorCNA_txnE: 0.9999
# control segmentation - higher (e.g. 10000000) leads to higher specificity and fewer segments
# lower (e.g. 100) leads to higher sensitivity and more segments
ichorCNA_txnStrength: 10000
ichorCNA_plotFileType: pdf
ichorCNA_plotYlim: c(-2,4)
~
configfile_MRD.yaml
## read depth params ##
## Analysis of CyclomicsSeq manuscript -- CyclomicsSeq samples ##
out_path: /path/to/dir
readCounterScript: /path/to/HMMcopy/bin/readCounter (we used conda installed hmmcopy (version 0.1.1))
chrs:
1,2,3,4,5,6,7,8,9,10,11,12,13,14,15,16,17,18,19,20,21,22
binSize: 1000000 # set window size to compute coverage
## ichorCNA params ##
ichorCNA_libdir: ../../../ichorCNA
# included in GitHub repo
ichorCNA_rscript: ../runIchorCNA.R
# use panel matching same bin size (optional)
ichorCNA_normalPanel: Customized_REF_PoN_hg19_1Mb_median.rds, Customized_CYC_PoN_hg19_1Mb_median.rds, HD_ULP_PoN_1Mb_median_normAutosome_mapScoreFiltered_median.rds
# must use gc wig file corresponding to same binSize (required)
ichorCNA_gcWig: ../../inst/extdata/gc_hg19_1000kb.wig
# must use map wig file corresponding to same binSize (required)
ichorCNA_mapWig: ../../inst/extdata/map_hg19_1000kb.wig
# use bed file if sample has targeted regions, eg. exome data (optional)
ichorCNA_exons: NULL
ichorCNA_centromere: ../../inst/extdata/GRCh37.p13_centromere_UCSC-gapTable.txt
ichorCNA_minMapScore: 0.75
ichorCNA_chrs: c(1:22)
ichorCNA_fracReadsInChrYForMale: 0.002
ichorCNA_genomeBuild: hg19
ichorCNA_genomeStyle: NCBI
# chrs used for training ichorCNA parameters, e.g. tumor fraction.
ichorCNA_chrTrain: c(1:22)
# non-tumor fraction parameter restart values; higher values should be included for cfDNA
ichorCNA_normal: c(0.95,0.99,0.995,0.999)
# ploidy parameter restart values
ichorCNA_ploidy: c(2)
ichorCNA_estimateNormal: TRUE
ichorCNA_estimatePloidy: FALSE
ichorCNA_estimateClonality: FALSE
# states to use for subclonal CN
ichorCNA_estimateScPrevalence: FALSE
ichorCNA_scStates: c()
# set maximum copy number to use
ichorCNA_maxCN: 3
# TRUE/FALSE to include homozygous deletion state
ichorCNA_includeHOMD: FALSE
# Exclude solutions if total length of subclonal CNAs > this fraction of the genome
###### This has changed
ichorCNA_maxFracGenomeSubclone: 0.3
# Exclude solutions if total length of subclonal CNAs > this fraction of total CNA length
###### This has changed
ichorCNA_maxFracCNASubclone: 0.999
# control segmentation - higher (e.g. 0.9999999) leads to higher specificity and fewer segments
# lower (e.g. 0.99) leads to higher sensitivity and more segments
ichorCNA_txnE: 0.9999
# control segmentation - higher (e.g. 10000000) leads to higher specificity and fewer segments
# lower (e.g. 100) leads to higher sensitivity and more segments
ichorCNA_txnStrength: 10000
ichorCNA_plotFileType: pdf
ichorCNA_plotYlim: c(-2,4)

## Sheet: README
Supplemental Table S5. ichorCNA config files for high tumor fraction mode and MRD mode.
ichorCNA config files for snakemake pipeline of both high tumor fraction mode and MRD mode are provided. For more details see Supplemental Methods section ‘Somatic copy number alteration analysis and tumor fraction inference.’
