# Supplementary material for: Nanopore-based consensus sequencing enables accurate multimodal tumor cell-free DNA profiling
Source: Genome Res. 2025 Apr;35(4):886–99. doi: 10.1101/gr.279144.124 (PMC12047234; doi:10.1101/gr.279144.124)
Supplement: Supplement 19 [file Supplemental_Table_S6.xlsx]

## Sheet: Sheet1
	Prior knowledge				ichorCNA solutions										Description
Sample name	mutation observed in ddPCR	ASCAT Ploidy	ASCAT Purity	Expected Ploidy	Setting	Index of solution in default output	loglikelihood	n	p	ploidy	TF	subclone fraction (subclone tumor fraction)	Frac genome subclonal (<0.5)	Frac. CNA subclonal ( < 0.7)
OVCA01_REF_TR2		3.22	0.6		config_highTF	9	3086	0.5	3	2.96	0.5343	0.443	0.11	0.14	Guided by Ascat ploidy.
OVCA01_RCS					config_highTF	11	2251	0	3	2.94	0.7129	0.511	0.14	0.18	Guided by Ascat ploidy. Solution similar to REF.
OVCA01_ILL					config_highTF	15	2535	0.4	3	2.95	0.684	0.471	0.12	0.16	Guided by Ascat ploidy.
GCT01_REF		2.11	0.98		config_highTF	1	4592	0.9	2	2	0.9363	0.763	0.04	0.33	Default
GCT01_RCS	0.186				config_highTF	1	3221	0.5	2	1.95	0.413	0.493	0.1	0.55	Default
GCT01_ILL					config_highTF	1	4489	0.6	2	2.02	0.4216	0.277	0.18	0.64	Default
GCT02_REF		2.01	0.81		config_highTF	1	5594	0.1	2	2	0.8094	0			Use somatic SNV knowledge from ASCAT. Choose the solution with the same ploidy and tumor purity. First solution.
GCT02_RCS					config_highTF	4	2793	0.4	2	2.24	0.4947	0.766	0.04	0.15	Similar CNV as GCT02-B4. Lower subclonal CNA level.
GCT02_ILL					config_highTF	1	5246	0.6	2	2.18	0.4955	0.114	0.12	0.29	Default
GCT02-B4_RCS	0.35				config_highTF	1	4481	0.6	2	2.23	0.4146	0.131	0.14	0.32	Default
GCT02-B6_RCS	0.4				config_highTF	4	2793	0.4	2	2.24	0.4947	0.766	0.04	0.15	Similar CNV as GCT02-B4. Lower subclonal CNA level.
GCT02-B9_RCS	0.017				config_highTF	1	3120	0.95	2	2.27	0.05976	0.498	0.03	0.07	Default. Lower Frac. CNA Subclonal than 2nd solution.
GCT02-B9_RCS	0.017				config_MRD	1	2669	0.95	2	Fixed = 2	0.07624	NA (0)			Pick the config_highTF one
GCT02-B10_RCS	0.0128				config_highTF	1	4067	0.7	2	1.95	0.287	0.765	0.02	0.22	Default
GCT02-B11_RCS	0.0012				config_highTF	1	2603	0.6	2	1.95	0.3812	0.74	0.04	0.47	Default
EAC01_REF		2.018	100% (This is not relevant because the CNA profile does not correlate with cfDNA.)		config_highTF	6	531.1	0.7	3	2.91	0.2127	0.735	0.16	0.2	Select same ploidy as OES01_ILL due to low quality WGS data of FFPE samples. ASCAT was not able to derive correct purity/ploidy/CNV.
EAC01_RCS	TP53 c.818G>A (12%)				config_highTF	1	2932	0.9	3	3.01	0.09978	0.526	0.02	0.04	Default
EAC01_ILL	TP53 c.818G>A (12%)				config_highTF	1	5316	0.9	3	3.01	0.1025	0.387	0.11	0.16	Low enough CNA Subclonal fraction
EAC02_REF		4.44	100%(This is not relevant because the CNA profile does not correlate with cfDNA.)		config_highTF	1	2290	0.9	2	2.14	0.1275	0.949	0.09	0.15	Default. Low CNA subclonal fraction.
EAC02_RCS	TP53 c733G>A (37%)				config_highTF	8	1035	0.7	2	1.93	0.3066	0.415	0.25	0.35	Closest ploidy to ILL solution.
EAC02_ILL	TP53 c733G>A (37%)				config_highTF	2	4787	0.6	2	1.98	0.2989	0.517	0.12	0.21	First solution has much higher Fraction CNA Subclonal.
HC01_RCS				2	config_MRD	1	6077	0.995	2	Fixed = 2	0.01461	NA (0)			Default
HC01_ILL				2	config_MRD	1	5104	0.995	2	Fixed = 2	0.009969	NA (0)			Default
HC02_RCS				2	config_MRD	1	6197	0.995	2	Fixed = 2	0.003497	NA (0)			Default
HC02_ILL				2	config_MRD	1	5503	0.995	2	Fixed = 2	0.00818	NA (0)			Default
HC03_RCS				2	config_MRD	1	5406	0.99	2	Fixed = 2	0.0126	NA (0)			Default
HC03_ILL				2	config_MRD	1	5988	0.995	2	Fixed = 2	0.008598	NA (0)			Default
OVCA02_RCS					config_highTF	1	2043	0.7	4	4	0.2432	0.302	0.09	0.13	Default
OVCA02_ILL					config_highTF	1	3550	0.7	4	4.05	0.2435	0.32	0.07	0.1	Default, next solution has a lot of n = 1 for CNA neutral region.
OVCA03_RCS					config_highTF	11	1961	0.6	4	4.09	0.3987	0.229	0.07	0.07	Deletion should not contain more than 1 level if there is no subclonal status of the two levels, even though the deletion is only a small area (Chr3-5)
OVCA03_ILL					config_highTF	12	2602	0.5	4	4.18	0.3518	0.429	0.05	0.06	Deletion should not contain more than 1 level if there is no subclonal status of the two levels, even though the deletion is only a small area (Chr3-5)
OVCA04_RCS					config_highTF	1	976.1	0.95	2	2.5	0.07	0.431	0.08	0.28	Noisy data. Subclones should be disabled to exclude noise resulted false CNA.
OVCA04_RCS					config_MRD	Not fit	Not fit	Not fit	Not fit	Not fit	Not fit	Not fit	Not fit	Not fit	Doesn't work. The TF is much larger than the starting TF.
OVCA04_ILL					config_highTF	3	4988	0.8	2	2	0.1886	0	0	0	Subclonal state at Chr4,9,21,22 are very subtle, while affecting tumor fraction largely. Hard to trust.
OVCA05_RCS					config_highTF	8	1168	0.2	3	2.86	0.7341	0.246	0.05	0.07	First solution of same ploidy as OVCA06_ILL.
OVCA05_ILL					config_highTF	1	3141	0	3	2.86	0.6853	0.788	0.08	0.12	Default
OVCA06_RCS					config_highTF	3	1952	0	3	2.71	0.4294	0.175	0.13	0.2	Same ploidy as OVCA06_ILL
OVCA06_ILL					config_highTF	1	4544	0.4	3	2.68	0.4145	0.282	0.04	0.07	Default
OVCA07_RCS					config_highTF	1	1408	0.5	2	1.95	0.6859	0.423	0.19	0.36	Default
OVCA07_ILL					config_highTF	1	3208	0.4	2	1.96	0.6764	0.284	0.26	0.42	Default
EAC03_RCS	max 15%, TP53 c.892G>T (15%), KRAS c.35G>A (4%)				config_highTF	1	3067	0.9	3	2.79	0.1094	0.461	0.24	0.31	Default
EAC03_ILL	max 15%, TP53 c.892G>T (15%), KRAS c.35G>A (4%)				config_highTF	1	5194	0.9	3	2.7	0.1015	0.623	0.07	0.13	Default
EAC04_RCS	TP53 c.742C>T (2%)				config_highTF	1	2791	0.6	2	2.01	0	0.632	0	0.62	Default
EAC04_RCS	TP53 c.742C>T (2%)				config_MRD	1	2698	0.999	2	Fixed = 2	0.02556	NA (0)			Default
EAC04_ILL	TP53 c.742C>T (2%)				config_highTF	1	4817	0.95	2	1.93	0.04389	0.736	0.12	0.56	Default
EAC04_ILL	TP53 c.742C>T (2%)				config_MRD	1	4470	0.99	2	Fixed = 2	0.03435	NA (0)			Default
EAC05_RCS	max 6%, TP53 c.388C>G (2%), c.916C>T (4%), CDKN2A c.172C>T (6%)				config_highTF	1	3059	0.9	3	2.86	0.07839	0.337	0.14	0.21	Default
EAC05_RCS	max 6%, TP53 c.388C>G (2%), c.916C>T (4%), CDKN2A c.172C>T (6%)				config_MRD	1	2496	0.99	2	Fixed = 2	0.08254	NA (0)			Default
EAC05_ILL	max 6%, TP53 c.388C>G (2%), c.916C>T (4%), CDKN2A c.172C>T (6%)				config_highTF	1	6050	0.95	2	2.09	0.07039	0.555	0.21	0.3	Default
EAC05_ILL	max 6%, TP53 c.388C>G (2%), c.916C>T (4%), CDKN2A c.172C>T (6%)				config_MRD	1	4993	0.95	2	Fixed = 2	0.07608	NA (0)			Default
10% admixture					config_highTF	3	3430	0.9	3	2.88	0.08184	0.637	0.31	0.42	Same ploidy as OVCA01
2% admixture					config_MRD	1	5011	0.99	2	Fixed = 2	0.022009	NA (0)			Default
1% admixture					config_MRD	1	4832	0.999	2	Fixed = 2	0.007761	NA (0)			Default
0.5% admixture					config_MRD	1	4932	0.999	2	Fixed = 2	0.005773	NA (0)			Default
HC04_RCS				2	config_MRD	1									Default
HC06_RCS				2	config_MRD	1									Default
HC07_RCS				2	config_MRD	1									Default
HC08_RCS				2	config_MRD	1									Default

## Sheet: README
Suppl Table S6. ichorCNA inference solutions for all samples.
Parameters of ichorCNA inference solutions for all samples. Information of prior knowledge on tumor biopsy, ichorCNA solution mode (high tumor fraction or MRD), and description of how the solution is derived. For more information see Methodssection "Somatic copy number alteration analysis and tumor fraction inference"
