# Supplementary material for: Nanopore-based consensus sequencing enables accurate multimodal tumor cell-free DNA profiling
Source: HighWire-hosted journal article supplement (doi:10.1101/gr.279144.124), 2025-01-13
Supplement: Supplemental_Fig_S5.pdf [file Supplemental_Fig_S5.pdf]

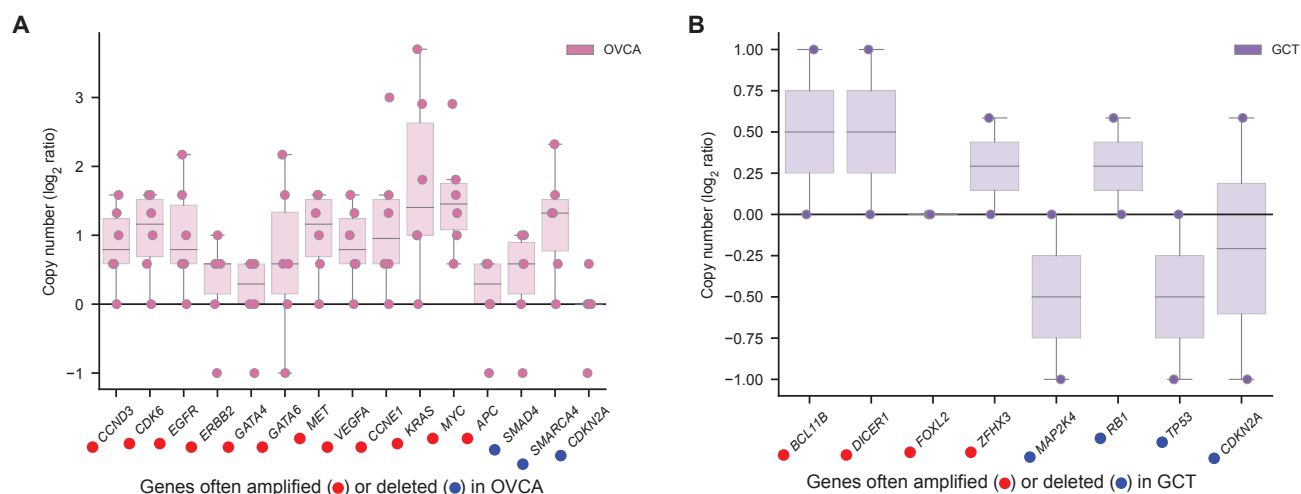

**Supplemental Figure S5. NanoRCS copy number of genes often amplified and deleted per cancer type.** Observed copy number distribution across the (A) OVCA (pink), (B) GCT (purple) samples in this study. Each data point represents a single sample. Commonly amplified (red) and deleted (blue) genes per cancer type are indicated below the graphs.
